# Supplementary material for: Asymmetric synthesis of 2-azabicyclo[3.3.1]nonanes by a microwave-assisted organocatalysed tandem desymmetrisation and intramolecular aldolisation
Source: Royal Society of Chemistry journal article supplement (doi:10.1039/b906835j), 2009-01-01

**Supplementary information**  
**for**  
**Asymmetric synthesis of 2-azabicyclo[3.3.1]nonanes by a**  
**microwave-assisted organocatalyzed tandem**  
**desymmetrization and intramolecular aldolization**

Faïza Diaba\* and Josep Bonjoch\*

*Laboratori de Química Orgànica, Facultat de Farmàcia, Institut de Biomedicina (IBUB), Universitat de Barcelona, Av. Joan XXIII s/n, 08028-Barcelona, Spain*

[faiza.diaba@ub.edu](mailto:faiza.diaba@ub.edu), [josep.bonjoch@ub.edu](mailto:josep.bonjoch@ub.edu)

**Contents**

- I) Experimental and NMR data of compounds 1-5
- II) Copies of  $^1\text{H}$  NMR and  $^{13}\text{C}$  NMR spectra of compounds 1-5

## I) Experimental section

**General procedures.**  $^1\text{H}$  and  $^{13}\text{C}$  NMR spectra were recorded in  $\text{CDCl}_3$  solution. Chemical shifts are reported as  $\delta$  values (ppm) relative to internal  $\text{Me}_4\text{Si}$ . Infrared spectra were recorded on a Nicolet 320 FT-IR spectrophotometer. TLC was performed on  $\text{SiO}_2$  (silica gel 60 F<sub>254</sub>, Merck). The spots were located by UV light, a 1%  $\text{KMnO}_4$  aqueous solution or a 1.5%  $\text{K}_2\text{PtCl}_6$  aqueous solution. Chromatography refers to flash chromatography and was achieved on  $\text{SiO}_2$  (silica gel 60, SDS, 230–400 mesh). All reactions were carried out under an argon atmosphere. Drying of the organic extracts during the work-up of reactions was performed over anhydrous  $\text{Na}_2\text{SO}_4$ . HPLC analyses for the determination of enantiomeric excess were carried out using a DAICEL CHIRALPAK IC column (250×4.6 mm I.D., 5  $\mu\text{m}$ ; Chiral Technologies Europe) on a Waters model 2487 Dual Absorbance Detector and set at the wavelength of 290 nm. The chromatog. resolu. of compound **4** was achieved using  $\text{CH}_2\text{Cl}_2/\text{MeOH}$  99: 1 as the mobile phase in an isocratic run. Microwave irradiation experiments were performed using a single-mode Discover System from CEM Corporation using standard Pyrex vessel (capacity 10 mL).

### *N*-(2,2-Diethoxyethyl)-4-aminocyclohexanone ethylene acetal (**2**)

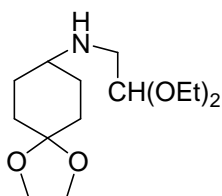

A mixture of cyclohexanedione monoethylene acetal (5 g, 31.05 mmol), 2,2-diethoxyethylamine (5.70 mL, 38.42 mmol) and molecular sieves (8 g) in  $\text{CH}_2\text{Cl}_2$  (60 mL) was stirred at rt for 4 h. The reaction mixture was filtered on a celite pad and concentrated to yield the corresponding imine.  $^1\text{H}$  NMR ( $\text{CDCl}_3$ , 300 MHz):  $\delta$  1.22 (t, 6H,  $J$  = 7.1 Hz,  $\text{CH}_3$ ), 1.84 (m, 4H), 2.46 (m, 4H), 3.50 (d, 2H,  $J$  = 5.40 Hz), 3.58 (m, 2H), 3.72 (m, 2H), 3.99 (s, 4H), 4.74 (t, 1H,  $J$  = 5.4 Hz);  $^{13}\text{C}$  NMR ( $\text{CDCl}_3$ , 75 MHz):  $\delta$  15.3 ( $\text{CH}_3$ ), 25.3 ( $\text{CH}_2$ ), 34.0 ( $\text{CH}_2$ ), 34.9 ( $\text{CH}_2$ ), 36.2 ( $\text{CH}_2$ ), 54.3 ( $\text{CH}_2$ ), 62.5 ( $\text{CH}_2$ ), 64.3 ( $\text{CH}_2$ ), 102.8 (CH), 107.9 (C), 172.6 (C=N). The residue was dissolved in MeOH (100 mL) and treated with  $\text{NaBH}_4$  (2.3 g, 62.09 mmol) at 0 °C then at rt overnight. Finally the mixture was concentrated, brine was added and the aqueous extracted with  $\text{CH}_2\text{Cl}_2$ . The organics were dried and concentrated to yield amine **2** in a quantitative yield and enough pure to be used in the next step without further purification. An analytical sample was obtained by chromatography ( $\text{CH}_2\text{Cl}_2$ - $\text{CH}_2\text{Cl}_2/\text{MeOH}$  97:3). **2**: IR (NaCl, neat): 3325, 2973, 2935, 2877, 1446, 1376, 1343, 1275, 1237, 1107, 1063, 1036, 922, 854, 733, 664  $\text{cm}^{-1}$ ;  $^1\text{H}$  NMR ( $\text{CDCl}_3$ , 400 MHz):  $\delta$  1.21 (t, 6H,  $J$  = 7.2 Hz,  $\text{CH}_3$ ), 1.37 (brs, 1H, NH), 1.45 (m, 2H), 1.55 (td, 2H,  $J$  = 12.6, 3.6 Hz), 1.77 (m, 2H), 1.87 (m, 2H), 2.54 (tt, 1H,  $J$  = 9.6, 3.6 Hz), 2.74 (d, 2H,  $J$  = 5.6 Hz), 3.54 (dq, 2H,  $J$  = 9.2, 7.2 Hz), 3.70 (dq, 2H,  $J$  = 9.2, 7.2 Hz), 3.93 (s, 4H), 4.58 (t, 1H,  $J$  = 5.6 Hz);  $^{13}\text{C}$  NMR ( $\text{CDCl}_3$ , 100 MHz):  $\delta$  15.3 ( $\text{CH}_3$ ), 30.1 ( $\text{CH}_2$ ), 32.9 ( $\text{CH}_2$ ), 49.5 ( $\text{CH}_2$ ), 55.0 (CH), 62.2 ( $\text{CH}_2$ ), 64.1 ( $\text{CH}_2$ ), 64.2 ( $\text{CH}_2$ ), 102.4 (CH), 108.6 (C). HRMS (ESI-TOF): Calcd for  $\text{C}_{14}\text{H}_{28}\text{NO}_4$  274.2012 ( $\text{M}^+ + 1$ ). Found 274.2012.

### ***N*-(2,2-Diethoxyethyl)-*N*-(methoxycarbonyl)-4-aminocyclohexanone ethylene acetal (3)**

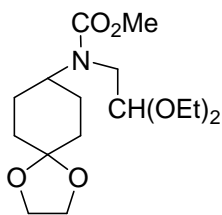

A mixture of amine **2** (8.5 g, 31.05 mmol), methyl chloroformate (4.85 mL, 62.1 mmol) and K<sub>2</sub>CO<sub>3</sub> (8.58 g, 62.1 mmol) in CH<sub>3</sub>CN (200 mL) was stirred at rt overnight. The solvent was then removed, brine was added and the aqueous extracted with CH<sub>2</sub>Cl<sub>2</sub>. The organics were dried, concentrated and the residue purified by chromatography (CH<sub>2</sub>Cl<sub>2</sub>-CH<sub>2</sub>Cl<sub>2</sub>/MeOH 99:1) to yield **3** as a colourless oil (8.74 g, 85%). **IR**: (NaCl, neat): 2974, 2947, 2879, 1700, 1452, 1402, 1372, 1344, 1287, 1247, 1158, 1100, 1064, 982, 930, 812, 774 cm<sup>-1</sup>; **<sup>1</sup>H NMR** (CDCl<sub>3</sub>, 400 MHz): δ 1.20 (t, 3H, *J* = 7.0 Hz, CH<sub>3</sub>), 1.54-1.94 (m, 8H), 3.25 (brs, 2H), 3.52 (brs, 2H), 3.71 (brs, 5H), 3.92 (s, 4H), 4.62 (brs, 1H); **<sup>13</sup>C NMR** (CDCl<sub>3</sub>, 100 MHz): δ 15.3 (CH<sub>3</sub>), 27.5 and 27.9 (CH<sub>2</sub>), 34.0 (CH<sub>2</sub>), 46.9 and 48.0 (CH<sub>2</sub>), 52.4 (CH<sub>3</sub>), 55.7 (CH), 63.3 (CH<sub>2</sub>), 64.3 (CH<sub>2</sub>), 101.5 and 102.0 (CH), 107.8 (C), 156.6 (CO). **HRMS** (ESI-TOF) Calcd for C<sub>16</sub>H<sub>29</sub>NO<sub>6</sub>Na 354.1887 (M<sup>+</sup>+Na). Found 354.1887.

### ***N*-(Methoxycarbonyl)-*N*-(2-oxoethyl)-4-aminocyclohexanone (1)**

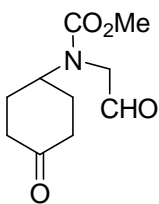

A solution of carbamate **3** (2 g, 6 mmol), THF (30 mL) and 5% HCl (60 mL) was stirred at rt for 10 min then it was extracted with CH<sub>2</sub>Cl<sub>2</sub>. The organics were dried and concentrated to yield ketoaldehyde **1** (1.2 g, 95%) enough pure to be used in the next step without further purification. An analytical sample was obtained by chromatography (CH<sub>2</sub>Cl<sub>2</sub>/AcOEt 1:1). **IR** (NaCl, neat): 2956, 2875, 2832, 2717, 1700, 1453, 1406, 1369, 1328, 1296, 1222, 1191, 1134, 1097, 997, 953, 775 cm<sup>-1</sup>; **<sup>1</sup>H NMR** (CDCl<sub>3</sub>, 400 MHz): δ 1.74 (brs, 2H), 2.09 (m, 2H), 2.39-2.60 (m, 4H), 3.72 and 3.80 (2s, 3H, CH<sub>3</sub>), 3.90 and 3.97 (2s, 2H), 4.41 and 4.63 (2brs, 1H), 9.56 (s, 1H, CHO); **<sup>13</sup>C NMR** (CDCl<sub>3</sub>, 100 MHz): δ 29.7 and 30.1 (CH<sub>2</sub>), 39.6 (CH<sub>2</sub>), 52.2 and 52.6 (CH<sub>2</sub>), 53.1 (CH<sub>3</sub>), 53.1 and 53.4 (CH), 156.0 and 156.6 (CO), 198.0 (CHO), 208.8 (CO); **HRMS** (ESI-TOF) Calcd for C<sub>10</sub>H<sub>15</sub>NO<sub>4</sub>Na 236.0893 (M<sup>+</sup>+Na). Found: 236.0893.

### **(1*RS*,4*SR*,5*SR*)-4-Hydroxy-2-methoxycarbonyl-2-azabicyclo[3.3.1]nonan-6-one (rac-4)**

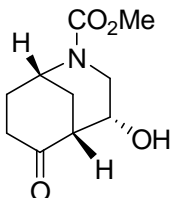

A solution of carbamate **3** (1 g, 3 mmol), THF (20 mL) and 10% HCl (40 mL) was stirred at rt for 4 h. The mixture was then extracted with CH<sub>2</sub>Cl<sub>2</sub>, the organics were dried and the solvent removed to yield **rac-4** (0.56 g, 87%). An analytical sample was obtained by chromatography (CH<sub>2</sub>Cl<sub>2</sub>/AcOEt 1:1). **IR** (NaCl, neat): 3413, 3008, 2953, 2926, 2872, 1698, 1450, 1403, 1341, 1300, 1263, 1217, 1192, 1121, 1106, 1087, 1070, 1037, 978, 942, 753 cm<sup>-1</sup>; **<sup>1</sup>H NMR** (CDCl<sub>3</sub>, 400 MHz, gCOSY): δ 1.90-2.24 (m, 4H), 2.46 (dt, 1H, *J* = 18, 8.4 Hz, H-7ax), 2.59 (ddd, 1H, *J* = 18, 9.2, 4.8 Hz, H-7eq), 2.82 (brs, 1H, H-5), 2.89 (t, 1H, *J* = 12.4 Hz, H-3ax), 3.24 and 3.27 (2d, 1H, *J* = 5.6 Hz, OH), 3.73 (s, 3H, CH<sub>3</sub>), 3.98 (brs, 1H, H-4), 4.23 and 4.37 (2dd, 1H, *J* = 13.2, 6 Hz, H-3eq), 4.45 and

4.61 (2brs, 1H, H-1);  $^{13}\text{C}$  NMR ( $\text{CDCl}_3$ , 100 MHz):  $\delta$  27.7 and 28.6 (C-9), 29.4 and 29.9 (C-8), 38.3 (C-7), 43.4 and 43.7 (C-1), 45.9 and 46.1 (C-3), 49.4 (C-5), 52.8 ( $\text{CH}_3$ ), 67.4 and 67.7 (C-4), 156.0 (CO), 212.3 and 213.2 (C-6). HRMS (ESI-TOF) Calcd for  $\text{C}_{10}\text{H}_{16}\text{NO}_4$  214.1073 ( $\text{M}^+ + \text{H}$ ). Found 214.1074.

**(1*R*,4*S*,5*S*)-4-Hydroxy-2-methoxycarbonyl-2-azabicyclo[3.3.1]nonan-6-one (4).**

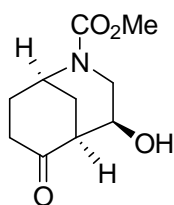

In a 10 mL vessel was placed ketoaldehyde **1** (0.1 g, 0.47 mmol), catalyst C (43 mg, 0.12 mmol, 25%), acetonitrile (1 ml) and water (0.08 mL, 4.4 mmol). The mixture was subsequently heated with stirring to 100 °C using microwave irradiation for 15 min. After concentration, the reaction mixture was purified by chromatography ( $\text{CH}_2\text{Cl}_2/\text{AcOEt}$  1:1) to give **4** (70 mg, 70%) as a viscous colourless oil: HPLC (Daicel Chiralpak IC,  $\text{CH}_2\text{Cl}_2/\text{MeOH}$  99:1, 1 mL  $\text{min}^{-1}$ ,  $\lambda$  = 290 nm; major isomer  $t$  = 8.48 min, minor isomer 9.63 min, 70% ee). **4**:  $[\alpha]_{\text{D}}^{23}$  = -74 ( $c$  = 1.7,  $\text{CHCl}_3$ ).

**Methyl 3-Formyl-4-hydroxy-2-azabicyclo[2.2.2]octane-2-carboxylate (*rac*-5).**

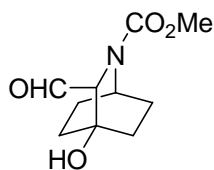

A mixture of ketoaldehyde **1** (0.1 g, 0.47 mmol),  $\text{CH}_2\text{Cl}_2$  (25 mL),  $\text{K}_2\text{CO}_3$  (0.2 g, 3.6 mmol), THF (10 mL) and  $\text{H}_2\text{O}$  (25 mL) was shaken for about 4 minutes then it was extracted with  $\text{CH}_2\text{Cl}_2$ . The organics were dried and concentrated to yield pure isoquinuclidine **rac-5** as a colourless viscous oil (88 mg, 88%). An analytical sample was obtained by chromatography ( $\text{CH}_2\text{Cl}_2/\text{AcOEt}$  1:1). IR (NaCl, neat): 3416, 2954, 2917, 2872, 2722, 1733, 1680, 1453, 1396, 1336, 1249, 1193, 1141, 1104, 1037, 1007, 957, 772, 734  $\text{cm}^{-1}$ ;  $^1\text{H}$  NMR ( $\text{CDCl}_3$ , 400 MHz, gCOSY):  $\delta$  1.50-2.16 (m, 8H), 2.62 and 2.79 (2brs, 1H, OH), 3.70 and 3.75 (2s, 3H,  $\text{CH}_3$ ), 3.94 and 4.03 (2brs, 1H, H-3), 4.10 and 4.24 (2brs, 1H, H-1), 9.71 and 9.72 (2d, 1H,  $J$  = 1.2 Hz, CHO);  $^{13}\text{C}$  NMR ( $\text{CDCl}_3$ , 100 MHz):  $\delta$  25.9 and 26.3 ( $\text{CH}_2$ ), 26.4 and 26.6 ( $\text{CH}_2$ ), 28.9 and 29.0 ( $\text{CH}_2$ ), 33.0 and 33.3 ( $\text{CH}_2$ ), 43.7 and 44.3 (C-1), 52.8 and 52.9 ( $\text{CH}_3$ ), 68.4 and 68.8 (C-3), 71.3 and 71.4 (C-4), 154.9 and 155.9 (CO), 204.2 and 204.4 (CHO); HRMS (ESI-TOF) Calcd for  $\text{C}_{10}\text{H}_{15}\text{NO}_4\text{Na}$  236.0893 ( $\text{M}^+ + \text{Na}$ ). Found 236.0893.

**Resolution of ( $\pm$ )-*rac*-4**

To a solution of ( $\pm$ )-**rac-4** (0.08 g, 0.35 mmol) in pyridine (2 mL) was added a solution of (S)-O-acetyl mandeloyl chloride (0.225 g, 1.06 mmol) in  $\text{CH}_2\text{Cl}_2$  (2 mL) dropwise at -5 °C and the mixture was stirred at this temperature for 3h. The reaction mixture was then quenched with water, extracted with  $\text{CH}_2\text{Cl}_2$  and the organics were dried and concentrated. After chromatography (hexane/ $\text{AcOEt}$  1:1) the two diastereomers were obtained almost pure with other intermediate fractions, overall yield 82%.

### (1*S*,4*R*,5*R*)-4.AcMA (less polar)

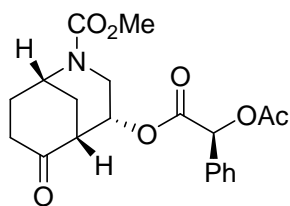

**IR (NaCl, neat):** 3067, 3016, 2953, 2873, 1747, 1700, 1495, 1448, 1409, 1374, 1342, 1300, 1230, 1107, 1047, 957, 754, 698  $\text{cm}^{-1}$ ;  **$^1\text{H}$  NMR** ( $\text{CDCl}_3$ , 400 MHz, 55  $^\circ\text{C}$ , gCOSY):  $\delta$  1.90-2.07 (m, 3H), 2.18 (m, 1H), 2.20 (s, 3H,  $\text{CH}_3$ ), 2.43 (ddd, 1H,  $J = 18, 11.2, 8.4$  Hz, H-7ax), 2.52 (dd, 1H,  $J = 18, 8$  Hz, H-7eq), 2.83 (brs, 1H, H-5), 3.23 (dd, 1H,  $J = 14, 10$  Hz, H-3ax), 3.73 (s, 3H,  $\text{CH}_3$ ), 4.31 (brs, 1H, H-3eq), 4.44 (brs, 1H, H-1), 5.10 (dt, 1H,  $J = 9.2, 7.2$  Hz, H-4), 5.85 (s, 1H, CHAr), 7.34-7.45 (m, 5H, ArH);  **$^{13}\text{C}$  NMR** ( $\text{CDCl}_3$ , 100 MHz):  $\delta$  20.5 ( $\text{CH}_3$ ), 29.9 (C-8), 30.7 (C-9), 38.7 (C-7), 43.7 (C-3), 44.3 (C-1), 47.2 (C-5), 52.9 ( $\text{CH}_3$ ), 69.2 (C-4), 74.5 (CHAr), 127.5, 128.8, 129.3 (CHAr), 133.3 (ipso-C), 156.0 (CO), 167.8 (CO), 170.3 (CO), 206.8 (C-6); **HRMS** (ESI-TOF) calcd for  $\text{C}_{20}\text{H}_{23}\text{NO}_7\text{Na}$  412.1367 ( $\text{M}^+ + \text{Na}$ ). Found 412.1364.

### (1*R*,4*S*,5*S*)-4.AcMA (more polar)

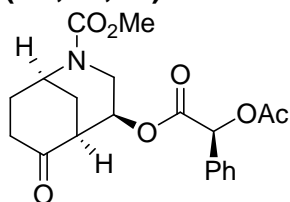

**IR (NaCl, neat):** 3067, 3012, 2953, 2874, 1752, 1700, 1448, 1408, 1374, 1341, 1300, 1234, 1106, 1084, 1047, 958, 752, 698  $\text{cm}^{-1}$ ;  **$^1\text{H}$  NMR** ( $\text{CDCl}_3$ , 400 MHz, 55  $^\circ\text{C}$ , gCOSY):  $\delta$  1.90-2.08 (m, 3H), 2.15 (m, 1H), 2.15 (s, 3H,  $\text{CH}_3$ ), 2.33 (ddd, 1H,  $J = 17.6, 12, 8.8$  Hz, H-7ax), 2.56 (dd, 1H,  $J = 17.6, 8$  Hz, H-7eq), 2.98 (brs, 1H, H-5), 3.01 (dd, 1H,  $J = 14.4, 10.4$  Hz, H-3ax), 3.71 (s, 3H,  $\text{CH}_3$ ), 4.21 (dd, 1H,  $J = 13.6, 7.6$  Hz, H-3eq), 4.43 (brs, 1H, H-1), 5.08 (dt, 1H,  $J = 8.8, 7.2$  Hz, H-4), 5.92 (s, 1H, CHAr), 7.34-7.46 (m, 5H, ArH);  **$^{13}\text{C}$  NMR** ( $\text{CDCl}_3$ , 100 MHz):  $\delta$  20.5 ( $\text{CH}_3$ ), 29.8 (C-8), 30.7 (C-9), 38.6 (C-7), 43.4 (C-3), 44.3 (C-1), 47.2 (C-5), 52.9 ( $\text{CH}_3$ ), 69.3 (C-4), 74.3 (CHAr), 127.7, 128.8, 129.3 (CHAr), 133.8 (ipso-C), 155.9 (CO), 167.7 (CO), 169.9 (CO), 207.0 (CO); **HRMS** (ESI-TOF) calcd for  $\text{C}_{20}\text{H}_{23}\text{NO}_7\text{Na}$  412.1367 ( $\text{M}^+ + \text{Na}$ ). Found 412.1364.

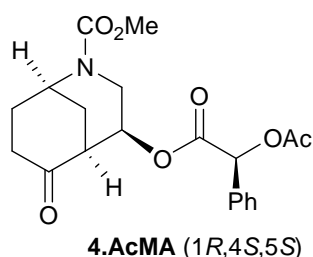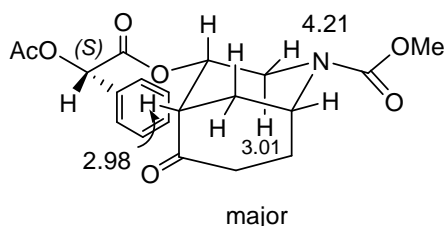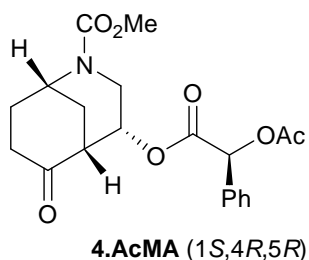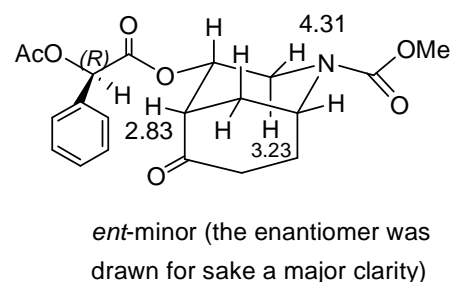

## II) Copies of $^1\text{H}$ NMR and $^{13}\text{C}$ NMR spectra of compounds 1-5

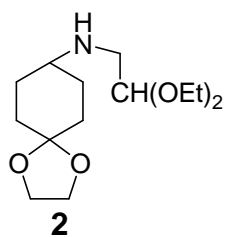

H1 / s2pul / Mercury-400F  
cdcl3 / Temp: 25C / N.Reg: XXXXXXXXXX  
Usuari: san / Mostra: TAN139F14  
Nom: FAIZA DIABA  
Data: 18/03/08 / Ope.: F.DIABA  
Pulse Sequence: s2pul

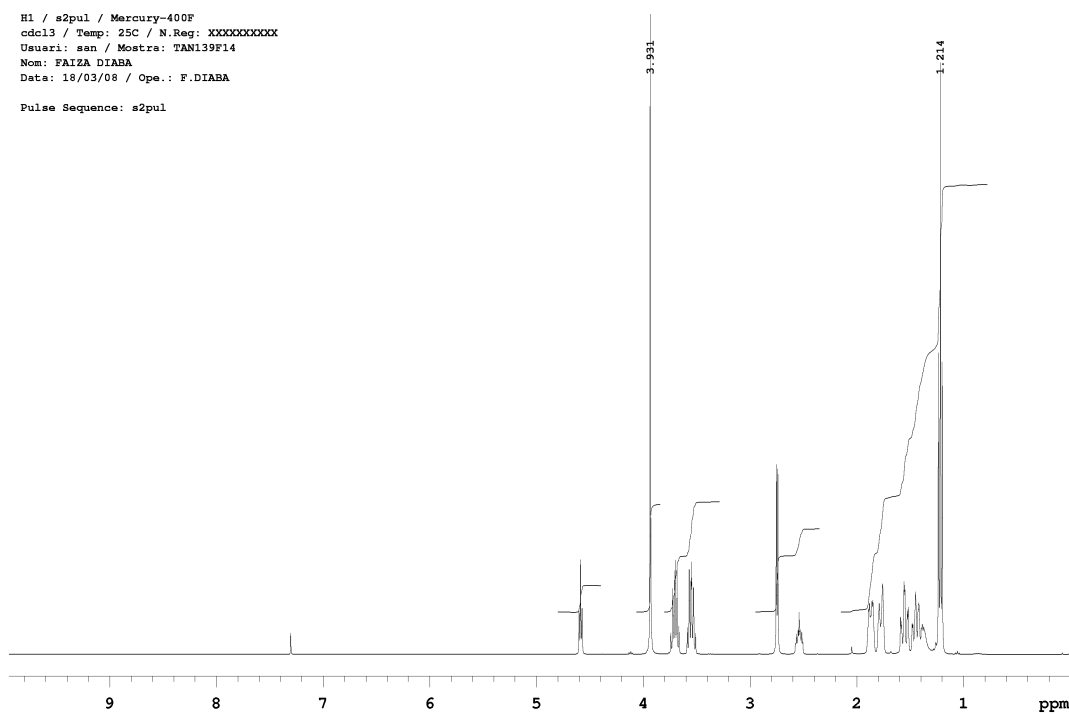

C13 / s2pul / Mercury-400F  
cdcl3 / Temp: 25C / N.Reg: XXXXXXXXXX  
Usuari: san / Mostra: TAN139F14  
Nom: FAIZA DIABA  
Data: 18/03/08 / Ope.: F.DIABA  
Pulse Sequence: s2pul

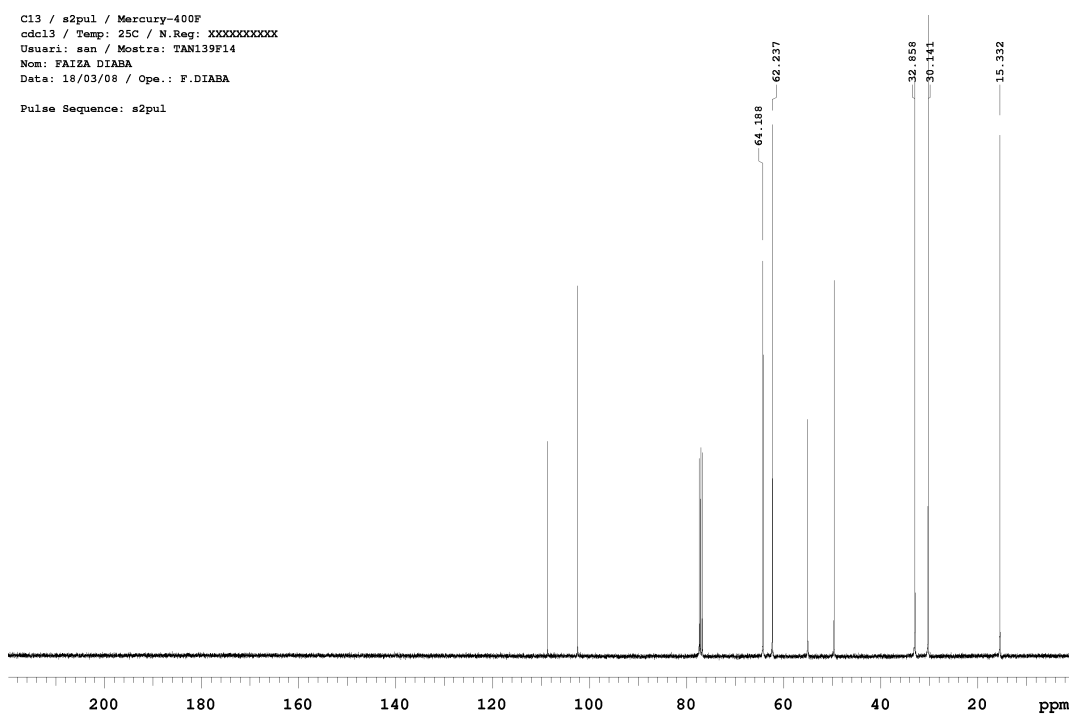

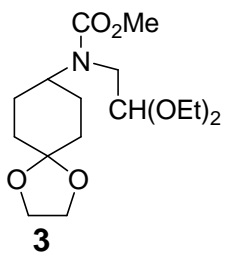

UNITAT DE RMN D ALT CAMP  
SERVEIS CIENTIFICOS-TECNICS  
UNIVERSITAT DE BARCELONA  
\*\*\*\*\*  
H1 / s2pul / Mercury-400\_gu1  
cdc13/Temp: 25C / N reg: R40006-170806181010  
Usuari: san / Mostra: tan025f31  
Nom: FATZA DIABA  
Data:17/08/08 / Sist automatic  
Pulse Sequence: s2pul  
\*\*\*\*\*  
Mercury-400BB "fenix"  
Relax. delay 0.500 sec  
Pulse 45.0 degrees  
Acq. time 3.500 sec  
Width 6402.0 Hz  
32 repetitions  
OBSERVE H1 400.112 MHz  
DATA PROCESSING  
Line broadening 0.3 Hz  
FT size 65536

| INDEX | FREQUENCY | PPM    | HEIGHT |
|-------|-----------|--------|--------|
| 1     | 1569.643  | 3.923  | 162.0  |
| 2     | 1489.539  | 3.723  | 13.9   |
| 3     | 1483.873  | 3.709  | 88.2   |
| 4     | 1306.807  | 3.251  | 9.2    |
| 5     | 703.155   | 1.757  | 10.3   |
| 6     | 700.615   | 1.751  | 9.4    |
| 7     | 487.461   | 1.218  | 63.8   |
| 8     | 480.427   | 1.201  | 125.8  |
| 9     | 473.394   | 1.183  | 61.7   |
| 10    | -0.000    | -0.000 | 13.1   |

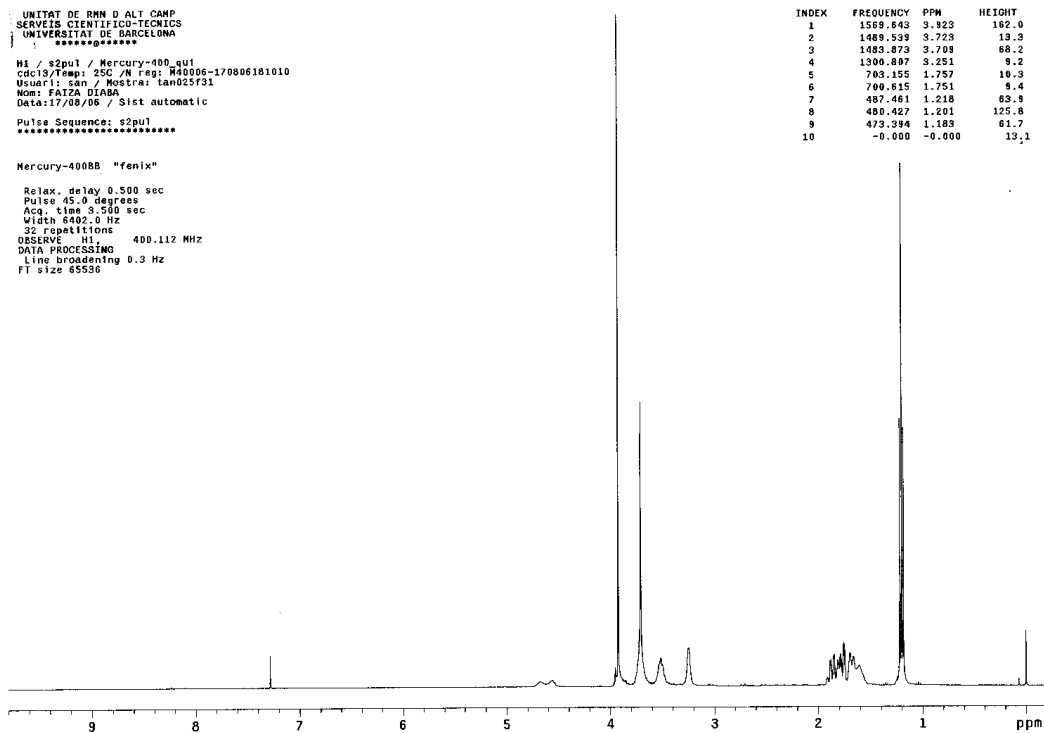

UNITAT DE RMN D ALT CAMP  
SERVEIS CIENTIFICOS-TECNICS  
UNIVERSITAT DE BARCELONA  
\*\*\*\*\*  
C13 / s2pul / Mercury-400\_gu1  
cdc13/Temp: 25C / N reg: R40006-170806181010  
Usuari: san / Mostra: tan025f31  
Nom: FATZA DIABA  
Data:17/08/08 / Sist automatic  
Pulse Sequence: s2pul  
\*\*\*\*\*  
Mercury-400BB "fenix"  
Relax. delay 0.200 sec  
Pulse 50.0 degrees  
Acq. time 1.200 sec  
Width 25325.6 Hz  
1000 repetitions  
OBSERVE C13, 100.608 MHz  
DECOUPLE H1, 400.113582 MHz  
Power 39 dB  
continuously on  
WALTZ-16 modulated  
DATA PROCESSING  
Line broadening 1.0 Hz  
FT size 65536

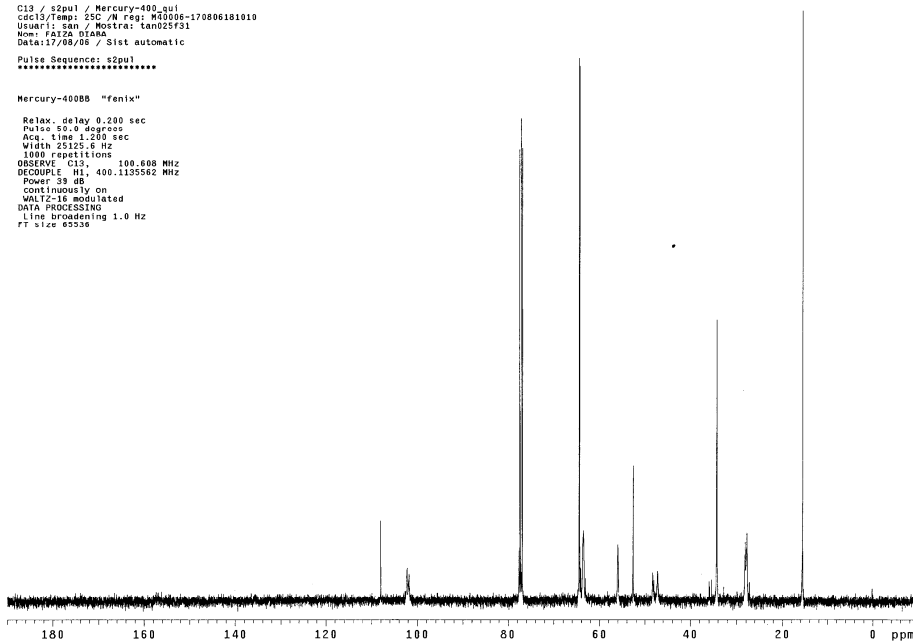

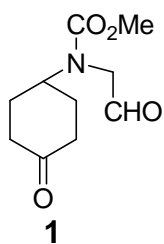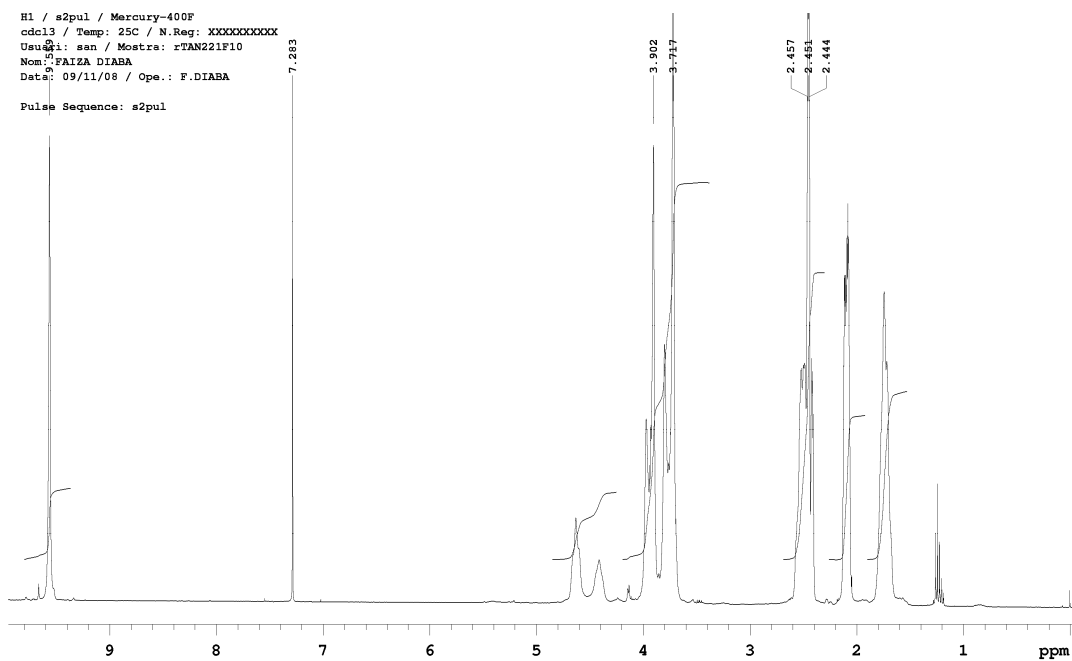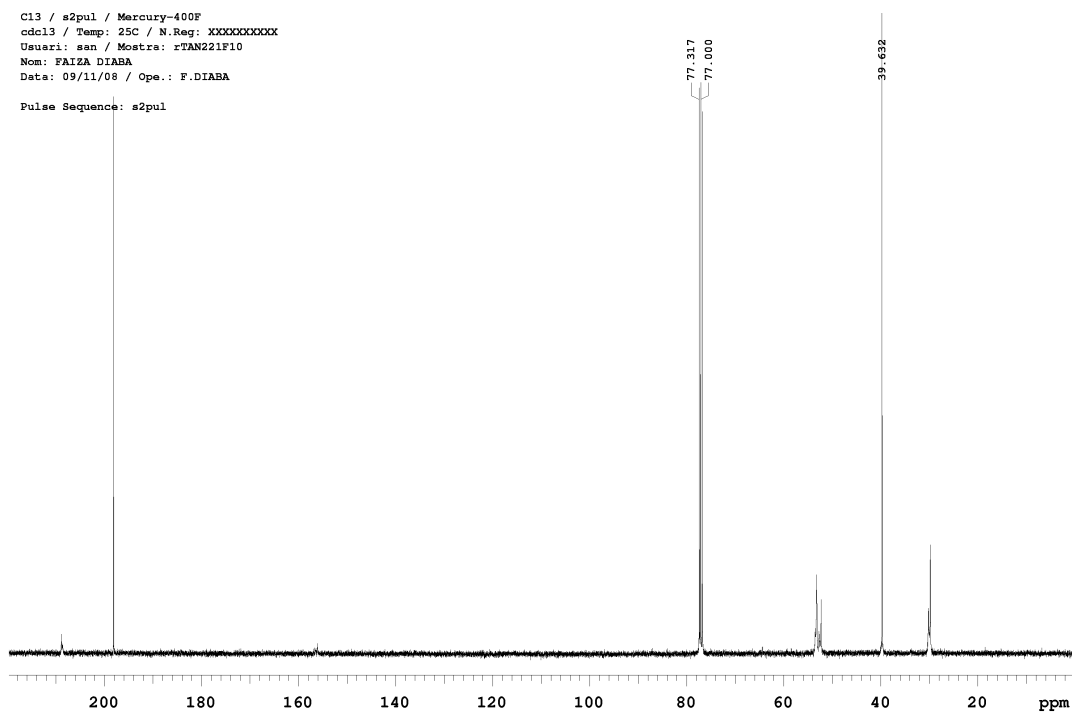



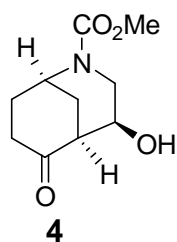

H1 / s2pul / Mercury-400F  
CDC13 / Temp: 25C / N.Reg: XXXXXXXXXX  
Usuari: san / Mostre: STAN185F12  
Nom: FAIZA DIABA  
Data: 07/08/08 / Ope.: F.DIABA  
Pulse Sequence: s2pul

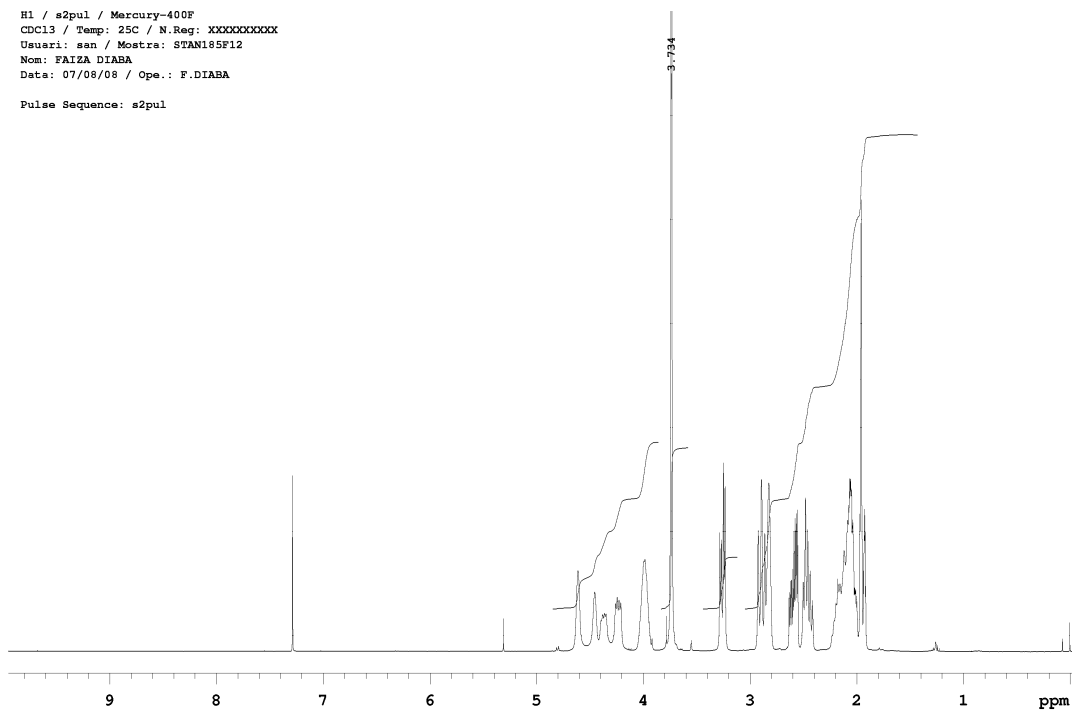

C13 / s2pul / Mercury-400F  
CDC13 / Temp: 25C / N.Reg: XXXXXXXXXX  
Usuari: san / Mostre: STAN185F12  
Nom: FAIZA DIABA  
Data: 07/08/08 / Ope.: F.DIABA  
Pulse Sequence: s2pul

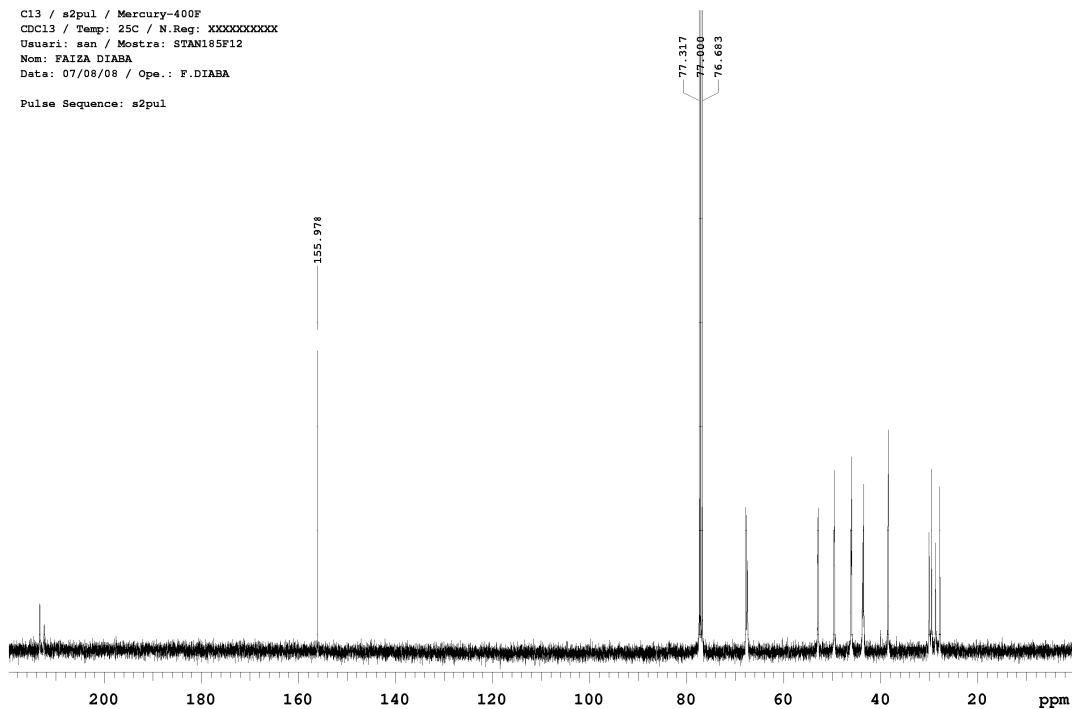

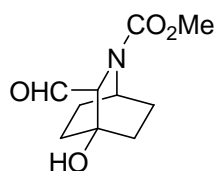

***rac*-5**

H1 / s2pul / Mercury-400F  
CDC13 / Temp: 25C / N.Reg: XXXXXXXXXX  
Usuari: sen / Mostra: Htan203f15  
Nom: FAIZA DIABA  
Data: 07/08/08 / Ope.: F.DIABA  
Pulse Sequence: s2pul

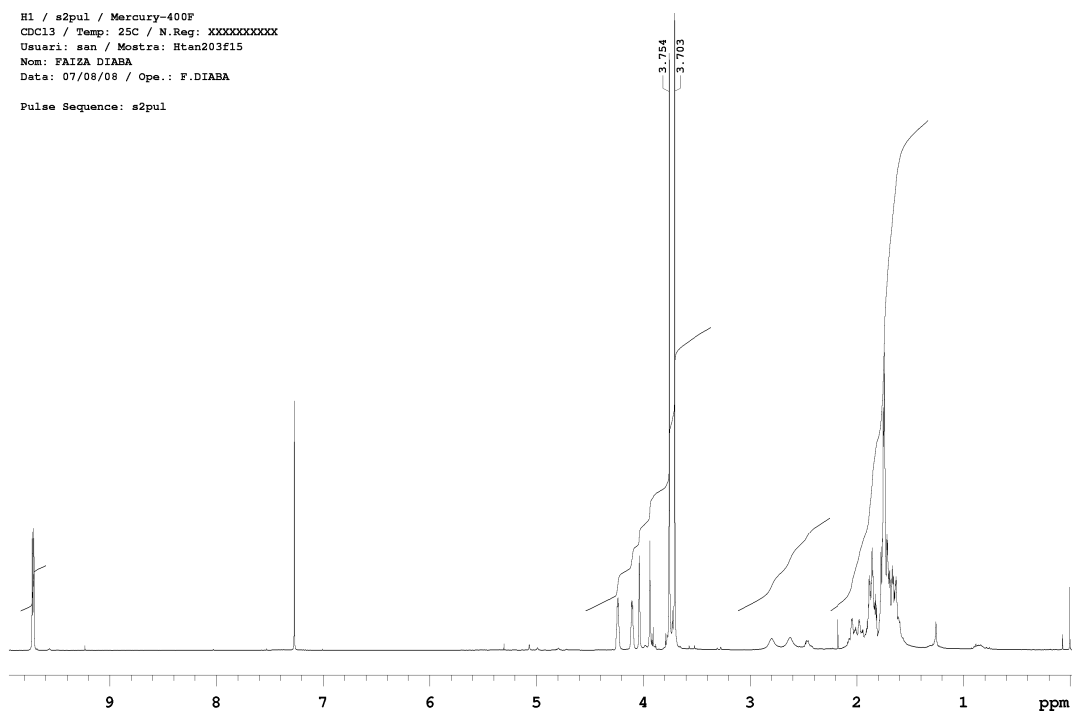

C13 / s2pul / Mercury-400F  
CDC13 / Temp: 25C / N.Reg: XXXXXXXXXX  
Usuari: sen / Mostra: Htan203f15  
Nom: FAIZA DIABA  
Data: 07/08/08 / Ope.: F.DIABA  
Pulse Sequence: s2pul

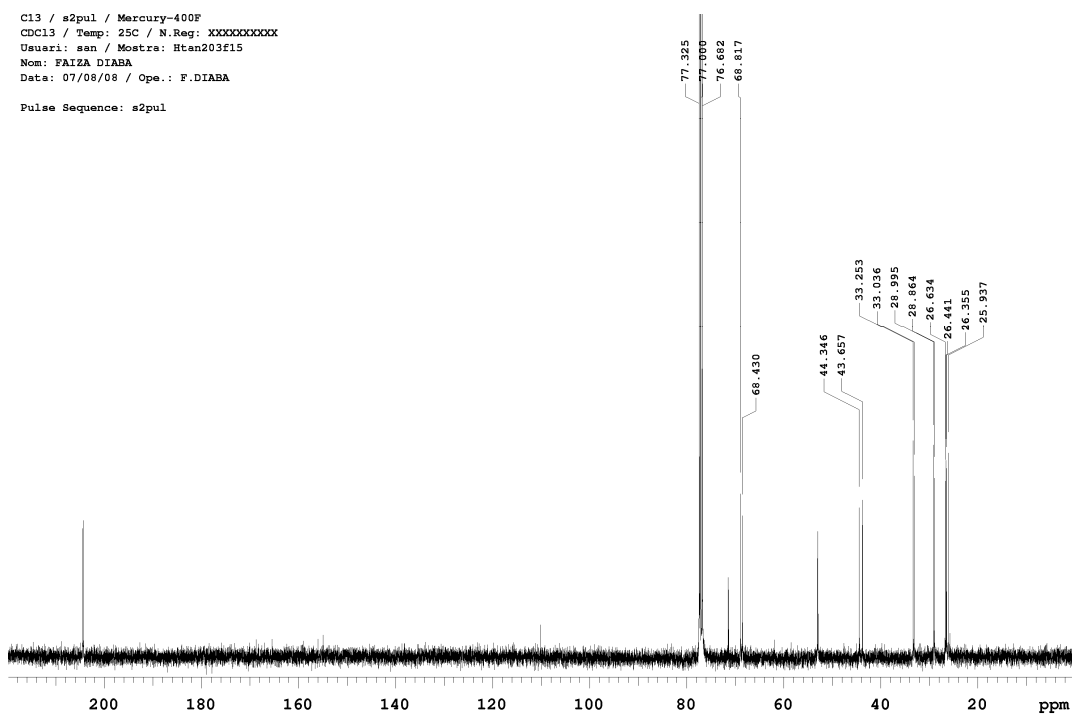

Supplement: b906835j.pdf [file b906835j.pdf]
